# Supplementary material
Source: PubMed Central journal article supplement (PMC6125528)
Supplement: zac009187449s1.pdf [file zac009187449s1.pdf]

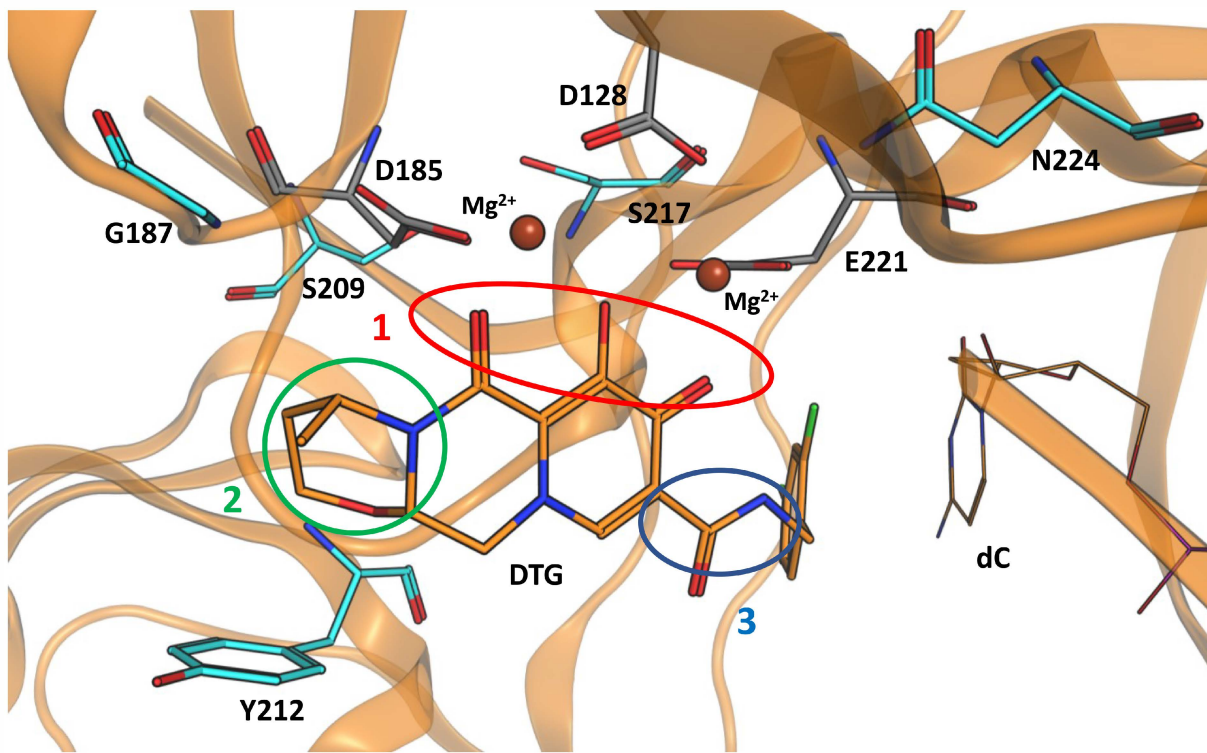

**Supplementary Figure 1. DTG bound to PFV Intasome.** DTG binding to the active site of the PFV intasome (PDB ID: 3S3M; orange) suggests there are three key structural features that make DTG a better able to resist mutations in and around the HIV IN active site compared to the first generation INSTIs (see text),: (1) the chelating motif of DTG (marked and outlined by a red circle) (2) the oxazinane ring on the “left-side” of DTG structure in the figure, which is conformationally flexible and occupies the same space as the target DNA (shown with a green circle), and (3) the longer linker that connects the benzyl moiety with the central pharmacophore (indicated by a blue circle).  $Mg^{2+}$  ions are maroon and labeled while the viral DNA is shadowed in the dark orange and line configurations (penultimate cytosine labeled dC). Catalytic DDE motif residues are depicted in gray and labeled, while residues in the active site that commonly undergo resistance mutations are depicted in cyan and labeled

# Supplemental Table 1

**A**

|            | M50I      | L74M      | T97A       | S119R     | E138K     | G140S     | Q146L     | Q146P      | Q148H      | Q148K      | Q148R     | S153Y     |
|------------|-----------|-----------|------------|-----------|-----------|-----------|-----------|------------|------------|------------|-----------|-----------|
| <b>DTG</b> | 2.1 ± 0.9 | 2.2 ± 0.4 | 1.1 ± 0.5  | 2.3 ± 0.6 | 1.8 ± 0.4 | 2.7 ± 0.7 | 2.1 ± 0.8 | 0.5 ± 0.04 | 0.6 ± 0.1  | 1.0 ± 0.01 | 1.3 ± 0.2 | 2.0 ± 0.7 |
| <b>4c</b>  | 1.3 ± 0.4 | 0.9 ± 0.2 | 1.9 ± 0.6  | 1.6 ± 0.6 | 2.1 ± 0.4 | 0.9 ± 0.1 | 3.5 ± 1.0 | 0.7 ± 0.04 | 0.5 ± 0.1  | 3.6 ± 0.5  | 2.1 ± 0.7 | 3.1 ± 0.4 |
| <b>4d</b>  | 1.3 ± 0.5 | 1.6 ± 0.6 | 0.9 ± 0.02 | 2.1 ± 0.1 | 2.5 ± 0.1 | 1.4 ± 0.4 | 2.6 ± 0.1 | 0.6 ± 0.1  | 0.6 ± 0.01 | 2.5 ± 0.1  | 2.3 ± 0.4 | 2.0 ± 0.4 |
| <b>4f</b>  | 1.9 ± 0.3 | 2.0 ± 0.3 | 1.6 ± 0.6  | 2.6 ± 0.4 | 2.6 ± 0.3 | 1.3 ± 0.3 | 4.6 ± 0.1 | 0.7 ± 0.1  | 0.6 ± 0.1  | 8.2 ± 2.5  | 2.0 ± 0.4 | 3.0 ± 0.1 |
| <b>6b</b>  | 2.1 ± 0.7 | 4.3 ± 0.8 | 1.2 ± 0.1  | 4.2 ± 0.6 | 4.1 ± 0.4 | 2.2 ± 0.7 | 6.6 ± 0.4 | 0.8 ± 0.6  | 1.5 ± 0.6  | 6.6 ± 0.3  | 2.1 ± 0.1 | 4.6 ± 0.8 |
| <b>6p</b>  | 1.3 ± 0.1 | 2.1 ± 0.1 | 1.4 ± 0.7  | 1.7 ± 0.3 | 1.8 ± 0.1 | 0.6 ± 0.3 | 2.7 ± 0.5 | 0.3 ± 0.1  | 0.4 ± 0.04 | 4.1 ± 0.3  | 1.4 ± 0.7 | 3.8 ± 0.7 |

**B**

|                 | M50I | L74M  | T97A | S119R | E138K   | G140S | Q146L   | Q146P   | Q148H | Q148K   | Q148R | S153Y |
|-----------------|------|-------|------|-------|---------|-------|---------|---------|-------|---------|-------|-------|
| <b>DTG - 4c</b> | NS   | 0.003 | NS   | NS    | NS      | 0.01  | NS      | < 0.001 | NS    | 0.002   | NS    | 0.04  |
| <b>DTG - 4d</b> | NS   | NS    | NS   | NS    | 0.04    | 0.03  | NS      | NS      | NS    | < 0.001 | 0.009 | NS    |
| <b>DTG - 4f</b> | NS   | NS    | NS   | NS    | 0.02    | 0.02  | 0.008   | 0.02    | NS    | 0.01    | 0.03  | NS    |
| <b>DTG - 6b</b> | NS   | 0.007 | NS   | 0.004 | < 0.001 | NS    | < 0.001 | NS      | NS    | < 0.001 | 0.001 | 0.003 |
| <b>DTG - 6p</b> | NS   | NS    | NS   | NS    | NS      | 0.005 | NS      | 0.02    | 0.02  | < 0.001 | NS    | 0.01  |

**Supplemental Table 1. A. The EC50 values (nM) were determined for DTG, 4c, 4d, 4f, 6b, and 6p against the INSTI-resistant mutants by using a single round infection assay, n=4.** The concentrations (nM) are measured by the reductions in luciferase reporter activity in the presence of varying amounts of the inhibitors. Standard deviations follow the plus-minus sign and were calculated from the EC50 values, n=4. **B. Statistical significance in the differences in the antiviral activities of DTG and our compounds (4c, 4d, 4f, 6b, and 6p).** P values indicating statistically significant differences in the antiviral activities of DTG and our compounds (4c, 4d, 4f, 6b, and 6p) for the various INSTI-resistant mutants.

# Supplemental Table 2

**Supplemental Table 2.** Statistical significance of the antiviral data among DTG and our compounds. The Student's t test was used to calculate the statistical significance of the differences in the antiviral activities of the INSTIs. Because of multiple comparisons, P values < 0.025 were considered statistically significant when comparing the efficacies among DTG and 4c, 4d, 4f, 6b, and 6p.

| Figure and Supplementary Table                                       | p-Value < 0.05              | p-Value < 0.01             | p-Value < 0.001            | Overall Comparison among INSTIs for Table |   |          |   |
|----------------------------------------------------------------------|-----------------------------|----------------------------|----------------------------|-------------------------------------------|---|----------|---|
|                                                                      |                             |                            |                            | DTG > 4c                                  | 3 | 4c > DTG | 2 |
| <b>Figure 2</b><br>Antiviral Data and Supplementary Tables 1A and 1B | DTG-4d (E138K)              | 4c-DTG (L74M)              | DTG-6b (E138K)             | DTG > 4c                                  | 3 | 4c > DTG | 2 |
|                                                                      | DTG-4f (E138K)              | DTG-4b (L74M)              | DTG-6b (Q146L)             | DTG > 6b                                  | 7 | 6b > DTG | 0 |
|                                                                      | 4d-DTG (G140S)              | DTG-4b (S119R)             | DTG-4c (Q146P)             | DTG > 4d                                  | 3 | 4d > DTG | 1 |
|                                                                      | 4f-DTG (G140S)              | 4c-DTG (G140S)             | DTG-6b (Q148K)             | DTG > 6p                                  | 2 | 6p > DTG | 3 |
|                                                                      | 6p-DTG (Q146P)              | 6p-DTG (G140S)             | DTG-4d (Q148K)             | DTG > 4f                                  | 5 | 4f > DTG | 1 |
|                                                                      | DTG-4f (Q146P)              | DTG-4f (Q146L)             | DTG-6p (Q148K)             |                                           |   |          |   |
|                                                                      | 6p-DTG (Q148H)              | DTG-4c (Q148K)             | DTG-6b (Q148R)             |                                           |   |          |   |
|                                                                      | DTG-4f (Q148R)              | DTG-4f (Q148K)             |                            |                                           |   |          |   |
|                                                                      | DTG-4c (S153Y)              | DTG-4d (Q148R)             |                            |                                           |   |          |   |
|                                                                      |                             | DTG-6b (S153Y)             |                            |                                           |   |          |   |
|                                                                      | DTG-6p (S153Y)              |                            |                            |                                           |   |          |   |
| <b>Figure 2</b><br>Antiviral Data and Supplementary Tables 3A and 3B | 6b-DTG (G140A/Q148H)        | 4c-DTG (G140A/Q148H)       | 4c-DTG (Q148H/N155H)       | DTG > 4c                                  | 3 | 4c > DTG | 5 |
|                                                                      | 6p-DTG (Y143R/Q148H)        | 4d-DTG (G140A/Q148H)       | DTG-6b (E138K/Q148K)       | DTG > 4d                                  | 1 | 4d > DTG | 8 |
|                                                                      | DTG-4c (E138K/Q148K)        | 6p-DTG (G140A/Q148H)       | 4d-DTG (E138K/Q148K)       | DTG > 4f                                  | 7 | 4f > DTG | 1 |
|                                                                      | DTG-4d (E138A/Q148R)        | 4f-DTG (G140A/Q148H)       | DTG-6p (E138K/Q148K)       | DTG > 6b                                  | 8 | 6b > DTG | 1 |
|                                                                      | 4c-DTG (G140C/Q148R)        | 4d-DTG (Q148H/N155H)       | 4c-DTG (G140A/Q148K)       | DTG > 6p                                  | 6 | 6p > DTG | 5 |
|                                                                      | 4d-DTG (G140C/Q148R)        | 6p-DTG (Q148H/N155H)       | 4d-DTG (G140A/Q148K)       |                                           |   |          |   |
|                                                                      | 4d-DTG (G140S/Q148R)        | DTG-4f (E138K/Q148K)       | 6p-DTG (G140A/Q148K)       |                                           |   |          |   |
|                                                                      | DTG-6p (G140S/Q148R)        | 4d-DTG (G140S/Q148K)       | DTG-4f (G140A/Q148K)       |                                           |   |          |   |
|                                                                      | DTG-4f (Q148R/N155H)        | DTG-6b (E138A/Q148R)       | DTG-6b (G140S/Q148K)       |                                           |   |          |   |
|                                                                      |                             | DTG-6p (E138K/Q148R)       | 6p-DTG (G140S/Q148K)       |                                           |   |          |   |
|                                                                      |                             | DTG-6b (G140A/Q148R)       | DTG-4f (G140S/Q148K)       |                                           |   |          |   |
|                                                                      |                             | 4d-DTG (G140A/Q148R)       | DTG-6c (E138A/Q148R)       |                                           |   |          |   |
|                                                                      |                             | DTG-6p (G140A/Q148R)       | DTG-6p (E138A/Q148R)       |                                           |   |          |   |
|                                                                      |                             | 4c-DTG (G140S/Q148R)       | DTG-6b (E138K/Q148R)       |                                           |   |          |   |
|                                                                      |                             | DTG-6b (Q148R/N155H)       | DTG-4f (E138K/Q148R)       |                                           |   |          |   |
|                                                                      |                             |                            | DTG-4c (G140A/Q148R)       |                                           |   |          |   |
|                                                                      |                             |                            | DTG-6b (G140C/Q148R)       |                                           |   |          |   |
|                                                                      |                             | DTG-6p (G140C/Q148R)       |                            |                                           |   |          |   |
|                                                                      |                             | DTG-4f (G140C/Q148R)       |                            |                                           |   |          |   |
|                                                                      |                             | DTG-6b (G140S/Q148R)       |                            |                                           |   |          |   |
|                                                                      |                             | DTG-4f (G140S/Q148R)       |                            |                                           |   |          |   |
| <b>Figure 2</b><br>Antiviral Data and Supplementary Tables 4A and 4B | DTG-4d (E92Q/N155H)         | DTG-4c (E92Q/N155H)        | DTG-6b (E92Q/N155H)        | DTG > 4c                                  | 2 | 4c > DTG | 0 |
|                                                                      | DTG-4c (Y143H/N155H)        | DTG-4f (E92Q/N155H)        | DTG-6p (E92Q/N155H)        | DTG > 4d                                  | 2 | 4d > DTG | 0 |
|                                                                      | DTG-4d (Y143H/N155H)        |                            | DTG-6b (N155H/G163R)       | DTG > 4f                                  | 3 | 4f > DTG | 0 |
|                                                                      | DTG-4f (Y143H/N155H)        |                            | DTG-4f (N155H/G163R)       | DTG > 6b                                  | 2 | 6b > DTG | 0 |
|                                                                      | DTG-6p (N155H/G163R)        |                            |                            | DTG > 6p                                  | 2 | 6p > DTG | 0 |
| <b>Figure 3</b><br>Antiviral Data and Supplementary Tables 5A and 5B | 6b-DTG (E138K/G140A/Q148K)  | 4c-DTG (E138K/G140A/Q148K) | DTG-4f (E138K/G140A/Q148K) | DTG > 4c                                  | 1 | 4c > DTG | 4 |
|                                                                      | 6p-DTG (E138K/G140A/Q148K)  | 4d-DTG (E138K/G140A/Q148K) | 4c-DTG (L74M/G140A/Q148R)  | DTG > 4d                                  | 1 | 4d > DTG | 3 |
|                                                                      | DTG-6b (L74M/G140A/Q148R)   | 4d-DTG (L74M/G140A/Q148R)  | 4f-DTG (L74M/G140A/Q148R)  | DTG > 4f                                  | 4 | 4f > DTG | 1 |
|                                                                      | DTG-4c (E138K/G140C/Q148R)  | 4d-DTG (L74M/G140C/Q148R)  | 4c-DTG (L74M/G140C/Q148R)  | DTG > 6b                                  | 3 | 6b > DTG | 1 |
|                                                                      | 4c-DTG (E138A/S147G/Q148R)  | DTG-6b (E138K/G140C/Q148R) | DTG-6b (L74M/G140C/Q148R)  | DTG > 6p                                  | 2 | 6p > DTG | 1 |
|                                                                      |                             | DTG-4d (E138K/G140C/Q148R) | DTG-4f (L74M/G140C/Q148R)  |                                           |   |          |   |
|                                                                      |                             | DTG-4f (E138K/G140C/Q148R) | DTG-6p (E138K/G140C/Q148R) |                                           |   |          |   |
|                                                                      |                             | DTG-6b (E138A/S147G/Q148R) |                            |                                           |   |          |   |
|                                                                      |                             | DTG-4f (E138A/S147G/Q148R) |                            |                                           |   |          |   |
|                                                                      |                             |                            |                            |                                           |   |          |   |
| <b>Figure 3</b><br>Antiviral Data and Supplementary Tables 6A and 6B | DTG-6b (T97A/G140S/Q148H)   | DTG-4f (T97A/G140S/Q148H)  | 4c-DTG (T97A/G140S/Q148H)  | DTG > 4c                                  | 0 | 4c > DTG | 4 |
|                                                                      | DTG-6p (E138A/G140S/Q148H)  | DTG-4f (E138A/G140S/Q148H) | 4d-DTG (T97A/G140S/Q148H)  | DTG > 4d                                  | 1 | 4d > DTG | 5 |
|                                                                      | 4c-DTG (G140S/Y143R/Q148H)  | DTG-4f (G140S/Y143R/Q148H) | DTG-4d (T97A/G140S/Q148H)  | DTG > 4f                                  | 5 | 4f > DTG | 0 |
|                                                                      | 4d-DTG (G140S/Y143R/Q148H)  | 4d-DTG (G140S/Q148H/N155H) | DTG-6p (E138A/G140S/Q148H) | DTG > 6b                                  | 3 | 6b > DTG | 1 |
|                                                                      | 6p-DTG (G140S/Y143R/Q148H)  | DTG-4f (G140S/Q148H/N155H) | 4c-DTG (E138K/G140S/Q148H) | DTG > 6p                                  | 2 | 6p > DTG | 3 |
|                                                                      | DTG-6b (G140S/Q148H/N155H)  | DTG-6b (G140S/Q148H/G163K) | 6b-DTG (E138K/G140S/Q148H) |                                           |   |          |   |
|                                                                      | 6p-DTG (G140S/Q148H/G163K)  | DTG-4f (G140S/Q148H/G163K) | 4d-DTG (E138K/G140S/Q148H) |                                           |   |          |   |
|                                                                      |                             |                            | 6p-DTG (E138K/G140S/Q148H) |                                           |   |          |   |
|                                                                      |                             |                            | 4c-DTG (G140S/Q148H/G163K) |                                           |   |          |   |
|                                                                      |                             | 4d-DTG (G140S/Q148H/G163K) |                            |                                           |   |          |   |
| <b>Figure 3</b><br>Antiviral Data and Supplementary Tables 7A and 7B | DTG-4d (T66I/T97A/E157Q)    | DTG-6p (T66I/T97A/E157Q)   | 4c-DTG (T97A/Y143R/Q148H)  | DTG > 4c                                  | 1 | 4c > DTG | 3 |
|                                                                      | DTG-4f (T66I/T97A/E157Q)    | 4c-DTG (T97A/Y143R/N155H)  | 6b-DTG (T97A/Y143R/Q148H)  | DTG > 4d                                  | 2 | 4d > DTG | 2 |
|                                                                      | XZ434-6p (T97A/Y143R/N155H) | 4d-DTG (T97A/Y143R/N155H)  | 4d-DTG (T97A/Y143R/Q148H)  | DTG > 4f                                  | 3 | 4f > DTG | 0 |
|                                                                      | DTG-4c (T97A/Q148H/N155H)   | DTG-4f (T97A/Q148H/N155H)  | 6p-DTG (T97A/Y143R/Q148H)  | DTG > 6b                                  | 1 | 6b > DTG | 2 |
|                                                                      | 4c-DTG (G140S/Y143R/N155H)  | 6b-DTG (G140S/Y143R/N155H) | 6p-DTG (G140S/Y143R/N155H) | DTG > 6p                                  | 2 | 6p > DTG | 3 |
|                                                                      | DTG-4d (E92Q/N155H/G163R)   | DTG-6b (E92Q/N155H/G163R)  |                            |                                           |   |          |   |
|                                                                      | DTG-6p (E92Q/N155H/G163R)   | DTG-4f (E92Q/N155H/G163R)  |                            |                                           |   |          |   |

## Supplemental Table 3

**A**

|            | T66I/<br>E157Q | G140A/<br>Q148H | Y143R/<br>Q148H | Q148H/<br>N155H | E138K/<br>Q148K | G140A/<br>Q148K | G140S/<br>Q148K | E138A/<br>Q148R | E138K/<br>Q148R | G140A/<br>Q148R | G140C/<br>Q148R | G140S/<br>Q148R | Q148R/<br>N155H |
|------------|----------------|-----------------|-----------------|-----------------|-----------------|-----------------|-----------------|-----------------|-----------------|-----------------|-----------------|-----------------|-----------------|
| <b>DTG</b> | 0.5 ± 0.1      | 3.9 ± 0.7       | 0.8 ± 0.2       | 4.0 ± 0.6       | 25.0 ± 2.1      | 450.7 ± 58.8    | 2.3 ± 0.2       | 4.4 ± 0.8       | 3.9 ± 0.1       | 4.1 ± 0.3       | 2.9 ± 0.6       | 26.2 ± 6.8      | 7.1 ± 2.0       |
| <b>4c</b>  | 0.4 ± 0.1      | 1.6 ± 0.4       | 0.6 ± 0.1       | 0.9 ± 0.3       | 29.5 ± 2.7      | 43.1 ± 1.8      | 2.8 ± 0.9       | 9.4 ± 1.1       | 4.2 ± 1.9       | 2.3 ± 0.4       | 1.5 ± 0.4       | 4.8 ± 0.6       | 9.6 ± 2.1       |
| <b>4d</b>  | 0.4 ± 0.1      | 0.9 ± 0.1       | 0.6 ± 0.04      | 1.1 ± 0.2       | 16.0 ± 1.2      | 37.7 ± 1.2      | 1.6 ± 0.1       | 5.9 ± 0.7       | 3.0 ± 0.7       | 2.6 ± 0.5       | 1.5 ± 0.6       | 12.9 ± 1.2      | 7.5 ± 0.1       |
| <b>4f</b>  | 0.5 ± 0.1      | 1.5 ± 0.1       | 0.8 ± 0.1       | 4.3 ± 1.7       | 127.0 ± 16.8    | 789.0 ± 26.7    | 5.1 ± 0.4       | 5.1 ± 0.8       | 10.8 ± 0.8      | 4.3 ± 1.1       | 61.5 ± 1.1      | 181.6 ± 12.0    | 10.6 ± 1.7      |
| <b>6b</b>  | 0.5 ± 0.1      | 2.7 ± 0.1       | 0.5 ± 0.02      | 3.1 ± 0.6       | 134.4 ± 1.8     | 392.9 ± 13.9    | 3.8 ± 0.3       | 26.7 ± 4.9      | 16.7 ± 1.6      | 14.1 ± 2.6      | 9.0 ± 1.5       | 64.9 ± 7.3      | 31.3 ± 8.0      |
| <b>6p</b>  | 0.3 ± 0.2      | 1.2 ± 0.3       | 0.4 ± 0.2       | 2.1 ± 0.1       | 45.3 ± 2.5      | 54.1 ± 6.7      | 0.84 ± 0.2      | 9.8 ± 0.3       | 14.6 ± 2.0      | 6.3 ± 1.1       | 6.8 ± 0.9       | 46.5 ± 11.9     | 5.6 ± 0.4       |

**B**

|                 | T66I/<br>E157Q | G140A/<br>Q148H | Y143R/<br>Q148H | Q148H/<br>N155H | E138K/<br>Q148K | G140A/<br>Q148K | G140S/<br>Q148K | E138A/<br>Q148R | E138K/<br>Q148R | G140A/<br>Q148R | G140C/<br>Q148R | G140S/<br>Q148R | Q148R/<br>N155H |
|-----------------|----------------|-----------------|-----------------|-----------------|-----------------|-----------------|-----------------|-----------------|-----------------|-----------------|-----------------|-----------------|-----------------|
| <b>DTG - 4c</b> | NS             | 0.003           | NS              | < 0.001         | 0.04            | < 0.001         | NS              | < 0.001         | NS              | < 0.001         | 0.01            | 0.008           | NS              |
| <b>DTG - 4d</b> | NS             | 0.003           | NS              | 0.001           | < 0.001         | < 0.001         | 0.002           | 0.03            | NS              | 0.004           | 0.02            | 0.03            | NS              |
| <b>DTG - 4f</b> | NS             | 0.006           | NS              | NS              | 0.001           | < 0.001         | < 0.001         | NS              | < 0.001         | NS              | < 0.001         | < 0.001         | 0.04            |
| <b>DTG - 6b</b> | NS             | 0.04            | NS              | NS              | < 0.001         | NS              | < 0.001         | 0.002           | < 0.001         | 0.004           | < 0.001         | < 0.001         | 0.007           |
| <b>DTG - 6p</b> | NS             | 0.002           | 0.03            | 0.007           | < 0.001         | < 0.001         | < 0.001         | < 0.001         | 0.002           | 0.002           | < 0.001         | 0.03            | NS              |

**Supplemental Table 3 A.** The EC50 values (nM) were determined for DTG, 4c, 4d, 4f, 6b, and 6p against the INSTI-resistant mutants by using a single round infection assay, n=4. The concentrations (nM) are measured by the reductions in luciferase reporter activity in the presence of varying amounts of the inhibitors. Standard deviations follow the plus-minus sign and were calculated from the EC50 values, n=4. **B. Statistical significance in the differences in the antiviral activities of DTG and our compounds (4c, 4d, 4f, 6b, and 6p).** P values indicating statistically significant differences in the antiviral activities of DTG and our compounds (4c, 4d, 4f, 6b, and 6p) for the various INSTI-resistant mutants.

## Supplemental Table 4

**A**

|            | E92Q/<br>N155H | G140S/<br>N155H | Y143H/<br>N155H | Y143R/<br>N155H | N155H/<br>G163R |
|------------|----------------|-----------------|-----------------|-----------------|-----------------|
| <b>DTG</b> | 1.8 ± 0.2      | 2.0 ± 1.0       | 1.7 ± 0.7       | 2.5 ± 0.8       | 1.6 ± 0.4       |
| <b>4c</b>  | 4.7 ± 0.8      | 1.8 ± 0.3       | 2.8 ± 0.5       | 1.9 ± 0.6       | 2.6 ± 0.7       |
| <b>4d</b>  | 2.8 ± 0.6      | 2.3 ± 0.4       | 3.6 ± 0.1       | 1.7 ± 0.2       | 2.1 ± 0.6       |
| <b>4f</b>  | 22.3 ± 5.2     | 2.3 ± 0.6       | 3.7 ± 0.9       | 3.8 ± 0.9       | 5.2 ± 0.3       |
| <b>6b</b>  | 5.4 ± 0.4      | 2.8 ± 0.6       | 1.5 ± 0.4       | 2.8 ± 0.3       | 7.0 ± 0.6       |
| <b>6p</b>  | 4.5 ± 0.4      | 0.9 ± 0.3       | 1.5 ± 0.6       | 1.8 ± 0.2       | 2.3 ± 0.1       |

**B**

|                 | E92Q/<br>N155H | G140S/<br>N155H | Y143H/<br>N155H | Y143R/<br>N155H | N155H/<br>G163R |
|-----------------|----------------|-----------------|-----------------|-----------------|-----------------|
| <b>DTG - 4c</b> | 0.004          | NS              | 0.05            | NS              | NS              |
| <b>DTG - 4d</b> | 0.04           | NS              | 0.01            | NS              | NS              |
| <b>DTG - 4f</b> | 0.004          | NS              | 0.01            | NS              | < 0.001         |
| <b>DTG - 6b</b> | < 0.001        | NS              | NS              | NS              | < 0.001         |
| <b>DTG - 6p</b> | < 0.001        | NS              | NS              | NS              | 0.04            |

**Supplemental Table 4. A. The EC50 values (nM) were determined for DTG, 4c, 4d, 4f, 6b, and 6p against the INSTI-resistant mutants by using a single round infection assay, n=4.** The concentrations (nM) are measured by the reductions in luciferase reporter activity in the presence of varying amounts of the inhibitors. Standard deviations follow the plus-minus sign and were calculated from the EC50 values, n=4. **B. Statistical significance in the differences in the antiviral activities of DTG and our compounds (4c, 4d, 4f, 6b, and 6p).** P values indicating statistically significant differences in the antiviral activities of DTG and our compounds (4c, 4d, 4f, 6b, and 6p) for the various INSTI-resistant mutants.

## Supplemental Table 5

**A**

|            | E138K/G140A/<br>Q148K | L74M/G140A/<br>Q148R | L74M/G140C/<br>Q148R | E138K/G140C/<br>Q148R | E138A/S147G/<br>Q148R |
|------------|-----------------------|----------------------|----------------------|-----------------------|-----------------------|
| <b>DTG</b> | 212.1 ± 46.0          | 12.0 ± 0.2           | 10.2 ± 1.3           | 5.3 ± 1.0             | 5.5 ± 1.3             |
| <b>4c</b>  | 18.3 ± 6.3            | 6.3 ± 0.9            | 3.3 ± 0.8            | 11.2 ± 2.5            | 2.7 ± 0.5             |
| <b>4d</b>  | 11.6 ± 3.0            | 6.0 ± 1.6            | 5.5 ± 1.3            | 11.3 ± 2.1            | 3.7 ± 0.9             |
| <b>4f</b>  | 500.1 ± 64.0          | 3.8 ± 0.3            | 42.1 ± 4.9           | 111.1 ± 22.5          | 18.2 ± 4.2            |
| <b>6b</b>  | 138.1 ± 23.5          | 25.3 ± 6.7           | 53.8 ± 4.9           | 35.8 ± 5.4            | 12.9 ± 2.5            |
| <b>6p</b>  | 89.6 ± 6.6            | 13.6 ± 1.8           | 12.8 ± 2.4           | 22.5 ± 1.3            | 3.9 ± 0.5             |

**B**

|                 | E138K/G140A/<br>Q148K | L74M/G140A/<br>Q148R | L74M/G140C/<br>Q148R | E138K/G140C/<br>Q148R | E138A/S147G/<br>Q148R |
|-----------------|-----------------------|----------------------|----------------------|-----------------------|-----------------------|
| <b>DTG - 4c</b> | 0.003                 | < 0.001              | < 0.001              | 0.01                  | 0.02                  |
| <b>DTG - 4d</b> | 0.003                 | 0.005                | 0.002                | 0.006                 | NS                    |
| <b>DTG - 4f</b> | < 0.001               | < 0.001              | < 0.001              | 0.003                 | 0.006                 |
| <b>DTG - 6b</b> | 0.04                  | 0.03                 | < 0.001              | 0.001                 | 0.004                 |
| <b>DTG - 6p</b> | 0.01                  | NS                   | NS                   | < 0.001               | NS                    |

**Supplemental Table 5 A.** The EC50 values (nM) were determined for DTG, 4c, 4d, 4f, 6b, and 6p against the INSTI-resistant mutants by using a single round infection assay, n=4. The concentrations (nM) are measured by the reductions in luciferase reporter activity in the presence of varying amounts of the inhibitors. Standard deviations follow the plus-minus sign and were calculated from the EC50 values, n=4. **B. Statistical significance in the differences in the antiviral activities of DTG and our compounds (4c, 4d, 4f, 6b, and 6p).** P values indicating statistically significant differences in the antiviral activities of DTG and our compounds (4c, 4d, 4f, 6b, and 6p) for the various INSTI-resistant mutants.

## Supplemental Table 6

**A**

|            | T97A/G140S/<br>Q148H | E138A/G140S/<br>Q148H | E138K/G140S/<br>Q148H | G140S/Y143R/<br>Q148H | G140S/Q148H/<br>N155H | G140S/Q148H/<br>G163K |
|------------|----------------------|-----------------------|-----------------------|-----------------------|-----------------------|-----------------------|
| <b>DTG</b> | 55.9 ± 3.0           | 13.8 ± 4.8            | 68.2 ± 2.0            | 7.7 ± 2.0             | 77.9 ± 15.9           | 24.3 ± 1.1            |
| <b>4c</b>  | 27.7 ± 3.7           | 11.3 ± 1.3            | 11.1 ± 0.9            | 3.6 ± 1.2             | 93.4 ± 9.2            | 9.8 ± 2.3             |
| <b>4d</b>  | 20.4 ± 1.0           | 7.3 ± 0.4             | 7.7 ± 1.3             | 4.6 ± 0.5             | 21.6 ± 2.2            | 11.4 ± 1.0            |
| <b>4f</b>  | 124.9 ± 21.4         | 97.4 ± 20.0           | 55.9 ± 9.9            | 36.1 ± 9.3            | 142.3 ± 24.3          | 82.4 ± 14.5           |
| <b>6b</b>  | 124.9 ± 23.9         | 47.7 ± 1.9            | 31.2 ± 1.9            | 9.2 ± 2.0             | 116.9 ± 19.7          | 31.4 ± 1.9            |
| <b>6p</b>  | 99.0 ± 3.7           | 33.7 ± 8.6            | 28.8 ± 1.2            | 4.1 ± 0.7             | 71.6 ± 16.0           | 12.2 ± 0.2            |

**B**

|                 | T97A/G140S/<br>Q148H | E138A/G140S/<br>Q148H | E138K/G140S/<br>Q148H | G140S/Y143R/<br>Q148H | G140S/Q148H/<br>N155H | G140S/Q148H/<br>G163K |
|-----------------|----------------------|-----------------------|-----------------------|-----------------------|-----------------------|-----------------------|
| <b>DTG - 4c</b> | < 0.001              | NS                    | < 0.001               | 0.02                  | NS                    | < 0.001               |
| <b>DTG - 4d</b> | < 0.001              | NS                    | < 0.001               | 0.05                  | 0.005                 | < 0.001               |
| <b>DTG - 4f</b> | 0.007                | 0.003                 | NS                    | 0.007                 | 0.006                 | 0.004                 |
| <b>DTG - 6b</b> | 0.01                 | < 0.001               | < 0.001               | NS                    | 0.02                  | 0.002                 |
| <b>DTG - 6p</b> | < 0.001              | 0.01                  | < 0.001               | 0.03                  | NS                    | 0.03                  |

**Supplemental Table 6. A. The EC50 values (nM) were determined for DTG, 4c, 4d, 4f, 6b, and 6p against the INSTI-resistant mutants by using a single round infection assay, n=4.** The concentrations (nM) are measured by the reductions in luciferase reporter activity in the presence of varying amounts of the inhibitors. Standard deviations follow the plus-minus sign and were calculated from the EC50 values, n=4. **B. Statistical significance in the differences in the antiviral activities of DTG and our compounds (4c, 4d, 4f, 6b, and 6p).** P values indicating statistically significant differences in the antiviral activities of DTG and our compounds (4c, 4d, 4f, 6b, and 6p) for the various INSTI-resistant mutants.

## Supplemental Table 7

**A**

|            | T66I/T97A/<br>E157Q | T97A/Y143R/<br>Q148H | T97A/Y143R/<br>N155H | T97A/Q148H/<br>N155H | G140S/Y143R/<br>N155H | E92Q/N155H/<br>G163R |
|------------|---------------------|----------------------|----------------------|----------------------|-----------------------|----------------------|
| <b>DTG</b> | 0.5 ± 0.1           | 1.5 ± 0.1            | 8.5 ± 1.5            | 2.4 ± 0.7            | 2.6 ± 0.3             | 3.8 ± 0.7            |
| <b>4c</b>  | 0.5 ± 0.2           | 0.5 ± 0.2            | 3.8 ± 1.1            | 1.1 ± 0.2            | 1.3 ± 0.6             | 4.9 ± 0.6            |
| <b>4d</b>  | 1.3 ± 0.5           | 0.4 ± 0.1            | 2.7 ± 0.7            | 2.4 ± 0.4            | 2.4 ± 0.6             | 5.4 ± 0.2            |
| <b>4f</b>  | 3.2 ± 1.0           | 2.0 ± 0.5            | 10.1 ± 2.9           | 4.4 ± 0.6            | 1.9 ± 0.5             | 29.8 ± 5.3           |
| <b>6b</b>  | 0.9 ± 0.3           | 0.7 ± 0.1            | 8.3 ± 1.7            | 2.6 ± 0.4            | 1.6 ± 0.1             | 21.8 ± 4.0           |
| <b>6p</b>  | 0.8 ± 0.04          | 0.5 ± 0.03           | 4.6 ± 2.0            | 2.2 ± 0.1            | 1.0 ± 0.3             | 10.0 ± 2.5           |

**B**

|                 | T66I/T97A/<br>E157Q | T97A/Y143R/<br>Q148H | T97A/Y143R/<br>N155H | T97A/Q148H/<br>N155H | G140S/Y143R/<br>N155H | E92Q/N155H/<br>G163R |
|-----------------|---------------------|----------------------|----------------------|----------------------|-----------------------|----------------------|
| <b>DTG - 4c</b> | NS                  | < 0.001              | 0.003                | 0.03                 | 0.02                  | NS                   |
| <b>DTG - 4d</b> | 0.05                | < 0.001              | 0.002                | NS                   | NS                    | 0.02                 |
| <b>DTG - 4f</b> | 0.01                | NS                   | NS                   | 0.005                | NS                    | 0.002                |
| <b>DTG - 6b</b> | NS                  | < 0.001              | NS                   | NS                   | 0.004                 | 0.002                |
| <b>DTG - 6p</b> | 0.005               | < 0.001              | 0.02                 | NS                   | < 0.001               | 0.01                 |

**Supplemental Table 7 A.** The EC<sub>50</sub> values (nM) were determined for DTG, 4c, 4d, 4f, 6b, and 6p against the INSTI-resistant mutants by using a single round infection assay, n=4. The concentrations (nM) are measured by the reductions in luciferase reporter activity in the presence of varying amounts of the inhibitors. Standard deviations follow the plus-minus sign and were calculated from the EC<sub>50</sub> values, n=4. **B. Statistical significance in the differences in the antiviral activities of DTG and our compounds (4c, 4d, 4f, 6b, and 6p).** P values indicating statistically significant differences in the antiviral activities of DTG and our compounds (4c, 4d, 4f, 6b, and 6p) for the various INSTI-resistant mutants.



## Supplemental Table 8

| Mutant            | % of WT Activity ( $\pm$ SD) |
|-------------------|------------------------------|
| M50I              | 90.4 $\pm$ 20.5              |
| T66I              | 79.4 $\pm$ 6.7               |
| L74M              | 89.6 $\pm$ 18.3              |
| T97A              | 92.8 $\pm$ 4.0               |
| G118R             | 23.0 $\pm$ 2.2               |
| S119R             | 78.6 $\pm$ 15.5              |
| E138K             | 80.9 $\pm$ 2.7               |
| G140S             | 72.8 $\pm$ 12.1              |
| Q146L             | 64.6 $\pm$ 11.4              |
| Q146P             | 74.7 $\pm$ 9.3               |
| Q148H             | 51.7 $\pm$ 5.4               |
| Q148K             | 14.2 $\pm$ 0.8               |
| Q148R             | 43.3 $\pm$ 6.5               |
| S153Y             | 64.7 $\pm$ 12.0              |
| H51Y/R263K        | 13.8 $\pm$ 3.9               |
| T66I/E157Q        | 85.9 $\pm$ 7.6               |
| E92Q/N155H        | 71.4 $\pm$ 6.7               |
| E138A/Q148R       | 75.2 $\pm$ 16.1              |
| E138K/Q148K       | 49.4 $\pm$ 7.5               |
| E138K/Q148R       | 59.9 $\pm$ 5.4               |
| E138K/R263K       | 55.2 $\pm$ 8.0               |
| G140A/Q148H       | 8.8 $\pm$ 1.1                |
| G140A/Q148K       | 12.3 $\pm$ 1.3               |
| G140A/Q148R       | 48.6 $\pm$ 8.1               |
| G140C/Q148R       | 28.8 $\pm$ 2.0               |
| G140S/Q148H       | 66.0 $\pm$ 16.8              |
| G140S/Q148K       | 44.6 $\pm$ 8.5               |
| G140S/Q148R       | 32.6 $\pm$ 7.0               |
| G140S/N155H       | 19.5 $\pm$ 3.8               |
| Y143H/N155H       | 13.7 $\pm$ 3.3               |
| Y143R/Q148H       | 2.6 $\pm$ 0.2                |
| Y143R/N155H       | 33.9 $\pm$ 6.5               |
| Q148H/N155H       | 7.3 $\pm$ 2.9                |
| Q148R/N155H       | 13.8 $\pm$ 4.1               |
| N155H/G163R       | 55.1 $\pm$ 6.9               |
| T66I/T97A/E157Q   | 72 $\pm$ 4.5                 |
| L74M/G140A/Q148R  | 32.5 $\pm$ 4.4               |
| L74M/G140C/Q148R  | 29.4 $\pm$ 7.3               |
| E92Q/N155H/G163R  | 55.2 $\pm$ 11.6              |
| T97A/G140S/Q148H  | 55.9 $\pm$ 13.1              |
| T97A/Y143R/Q148H  | 5.2 $\pm$ 1.3                |
| T97A/Y143R/N155H  | 15.4 $\pm$ 2.1               |
| T97A/Q148H/N155H  | 6.6 $\pm$ 1.7                |
| E138A/G140S/Q148H | 85.2 $\pm$ 10.2              |
| E138A/S147G/Q148R | 83.7 $\pm$ 13.1              |
| E138K/G140A/Q148K | 42.9 $\pm$ 7.5               |
| E138K/G140C/Q148R | 44.4 $\pm$ 7.1               |
| E138K/G140S/Q148H | 54.4 $\pm$ 15.9              |
| G140S/Y143R/Q148H | 52.3 $\pm$ 1.1               |
| G140S/Y143R/N155H | 2.9 $\pm$ 0.8                |
| G140S/Q148H/N155H | 63 $\pm$ 14.9                |
| G140S/Q148H/G163K | 49.6 $\pm$ 17.2              |
| Mock              | 0 $\pm$ 0                    |

**Supplemental Table 8. Replication capacity of the INSTI-resistant mutants using a single-round infection assay.** The numerical values of the replication capacities of the INSTI-resistant mutants used in this study were measured using INSTI-resistant mutant vectors in a single round infection assay. The luciferase activity of the WT virions was set to 100, and the infectivity of the mutant vectors (adjusted for the amount of p24/Gag used in the assay) was measured relative to WT infectivity. Error bars represent the standard deviations of independent experiments, n=4.

## Supplemental Table 9

| Overall Comparison |    |          |    |
|--------------------|----|----------|----|
| DTG > 4c           | 10 | 4c > DTG | 18 |
| DTG > 4d           | 10 | 4d > DTG | 19 |
| DTG > 4f           | 27 | 4f > DTG | 3  |
| DTG > 6b           | 24 | 6b > DTG | 5  |
| DTG > 6p           | 16 | 6p > DTG | 15 |

| <i>p</i> -Value < 0.05 |   |          |   |
|------------------------|---|----------|---|
| DTG > 4c               | 5 | 4c > DTG | 4 |
| DTG > 4d               | 6 | 4d > DTG | 4 |
| DTG > 4f               | 6 | 4f > DTG | 1 |
| DTG > 6b               | 3 | 6b > DTG | 2 |
| DTG > 6p               | 4 | 6p > DTG | 7 |

| <i>p</i> -Value < 0.01 |    |          |   |
|------------------------|----|----------|---|
| DTG > 4c               | 2  | 4c > DTG | 6 |
| DTG > 4d               | 2  | 4d > DTG | 9 |
| DTG > 4f               | 13 | 4f > DTG | 1 |
| DTG > 6b               | 10 | 6b > DTG | 1 |
| DTG > 6p               | 4  | 6p > DTG | 3 |

| <i>p</i> -Value < 0.001 |    |          |   |
|-------------------------|----|----------|---|
| DTG > 4c                | 3  | 4c > DTG | 8 |
| DTG > 4d                | 2  | 4d > DTG | 6 |
| DTG > 4f                | 8  | 4f > DTG | 1 |
| DTG > 6b                | 12 | 6b > DTG | 2 |
| DTG > 6p                | 7  | 6p > DTG | 5 |

**Supplemental Table 9. Overall Comparison of the statistical significance of the antiviral data among DTG and 4c, 4d, 4f, 6b, and 6p.** The Student's t test was used to calculate the statistical significance of the differences in the antiviral activities of DTG and our compounds. The P values < 0.025, < 0.01, and < 0.001 between **DTG and 4c, 4d, 4f, 6b, and 6p** were used to decide which INSTIs were more broadly efficacious against the mutants.
